# Supplementary material
Source: PubMed Central journal article supplement (PMC380983)
Supplement: 7600128s4.pdf [file 7600128s4.pdf]

# Suppl.4

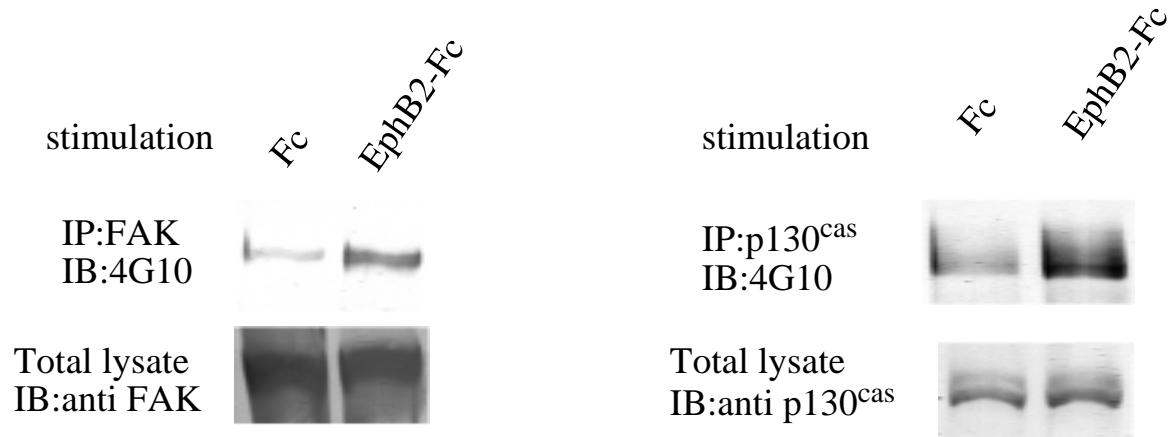

#### Supplementary information 4

Activation of ephrin-B1 induces increased tyrosine-phosphorylation of p130<sup>cas</sup> and FAK. The lysates were prepared from dissociated cortical neurons from E14 mouse embryos plated on Fc-coated, or on preclustered EphB2-Fc-coated plates for 15 min. Lysates were immunoprecipitated with anti-p130<sup>cas</sup> or anti-FAK antibody as indicated. The precipitants were separated on SDS-PAGE gels and analyzed by immunoblotting with anti-phosphotyrosine (4G10). Expression of total p130<sup>cas</sup> and FAK is shown at the bottom.
